# Supplementary material for: Potential Effects of Essential Oil from Plinia cauliflora (Mart.) Kausel on Leishmania: In Vivo, In Vitro, and In Silico Approaches
Source: MDPI journal article supplement (doi:10.3390/microorganisms12010207), 2024-01-19
Supplement: s1 [file s1]

# Potential of Essential Oil from *Plinia cauliflora* (Mart.) Kausel on Leishmania and its complications: *in vivo*, *in vitro*, and *in silico* approaches

Vanderlan N. Holanda<sup>1,\*</sup>, Thaíse G. S. Brito<sup>1</sup>, João R. S. de Oliveira<sup>1</sup>, Rebeca X. da Cunha<sup>1</sup>, Ana P. S. da Silva<sup>1</sup>, Welson V. da Silva<sup>2</sup>, Tiago F. S. Araújo<sup>3</sup>, Josean F. Tavares<sup>4</sup>, Sócrates G. dos Santos<sup>5</sup>, Regina C. B. Q. Figueiredo<sup>2</sup> and Vera L. M. Lima<sup>1,\*</sup>

Correspondences: Vanderlan N. Holanda (Vanderlan.holanda@ufpe.br) and Vera L. M. Lima (lima.vera.ufpe@gmail.com). Laboratório de Lipídios e Aplicação de Biomoléculas em Doenças Prevalentes e Negligenciadas. Departamento de Bioquímica, Centro de Biociências, Universidade Federal de Pernambuco, Avenida Professor Moraes Rego, 1235, 50670-901 Recife, PE, Brazil.

## Supplementary Material

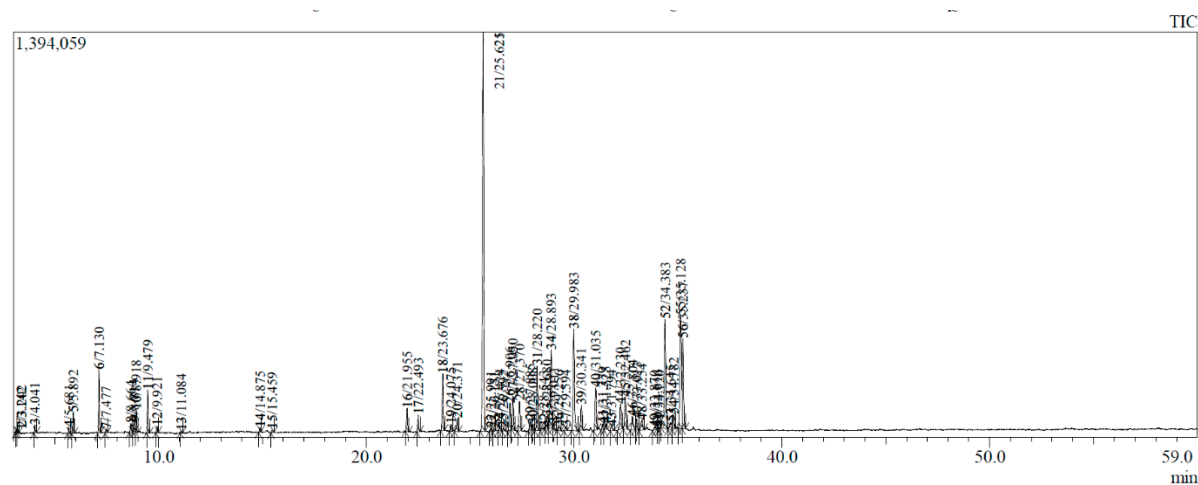

Figure S1. Spectral and chromatographic characteristics of PCEO composition.
